# Supplementary material for: Pcdh18a regulates endocytosis of E-cadherin during axial mesoderm development in zebrafish
Source: PubMed Central journal article supplement (PMC7609436; doi:10.1007/s00418-020-01887-5), 2020-06-01
Supplement: 418_2020_1887_MOESM7_ESM.pdf [file 418_2020_1887_MOESM7_ESM.pdf]

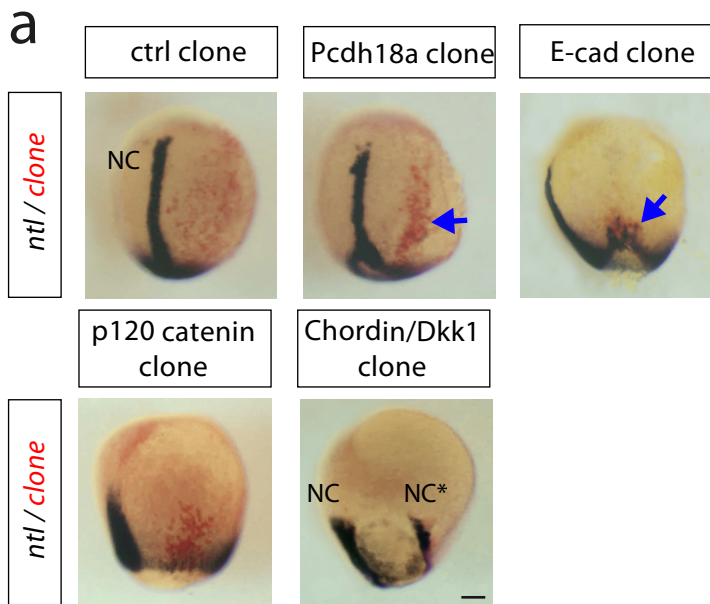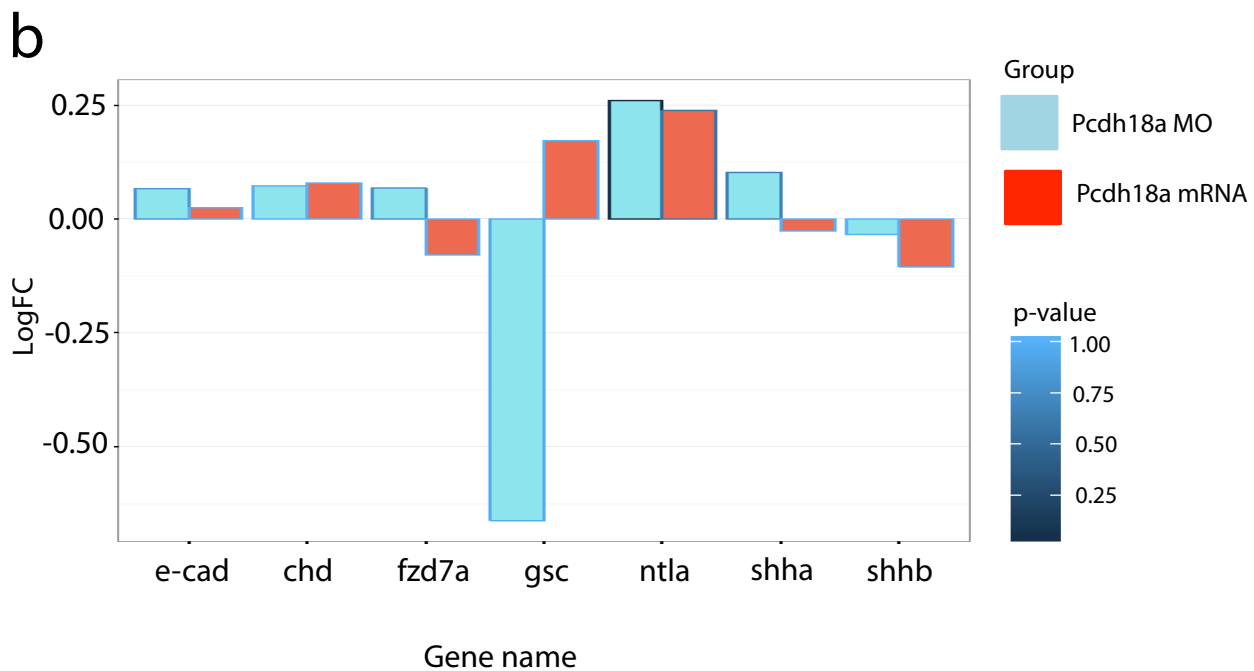

Supplementary Figure 7, Bosze et al., 2020
